# Supplementary material for: Lipid Composition Affects the Efficiency in the Functional Reconstitution of the Cytochrome c Oxidase
Source: MDPI journal article supplement (doi:10.3390/ijms21196981), 2020-09-23
Supplement: s1 [file s1]

## Supplementary Material for the manuscript

### **Lipid Composition Affects the Efficiency in the Functional Reconstitution of the Cytochrome *c* Oxidase**

Katharina Gloria Hugentobler<sup>1</sup>, Dorothea Heinrich<sup>2</sup>, Johan Berg<sup>3</sup>, Joachim Heberle<sup>4</sup>, Peter Brzezinski<sup>3</sup>, Ramona Schlesinger<sup>2</sup>, Stephan Block<sup>1\*</sup>

<sup>1</sup> Institute of Chemistry and Biochemistry, Emmy-Noether Group “Bionanointerfaces”, Freie Universität Berlin, Arnimallee 22, 14195 Berlin, Germany

<sup>2</sup> Department of Physics, Genetic Biophysics, Freie Universität Berlin, Arnimallee 22, 14195 Berlin, Germany

<sup>3</sup> Department of Biochemistry and Biophysics, The Arrhenius Laboratories for Natural Sciences, Stockholm University, SE-106 91 Stockholm, Sweden

<sup>4</sup> Department of Physics, Experimental Molecular Biophysics, Freie Universität Berlin, Arnimallee 22, 14195 Berlin, Germany

\*Corresponding author:

Stephan Block, e-mail: [stephan.block@fu-berlin.de](mailto:stephan.block@fu-berlin.de)

#### **Table of Contents**

|                                                                                                        |   |
|--------------------------------------------------------------------------------------------------------|---|
| S1. Proteoliposome size distributions                                                                  | 2 |
| S2. Proton turnover rate distributions for proteoliposomes made from a crude extract of soybean lipids | 3 |

## S1. Proteoliposome size distributions

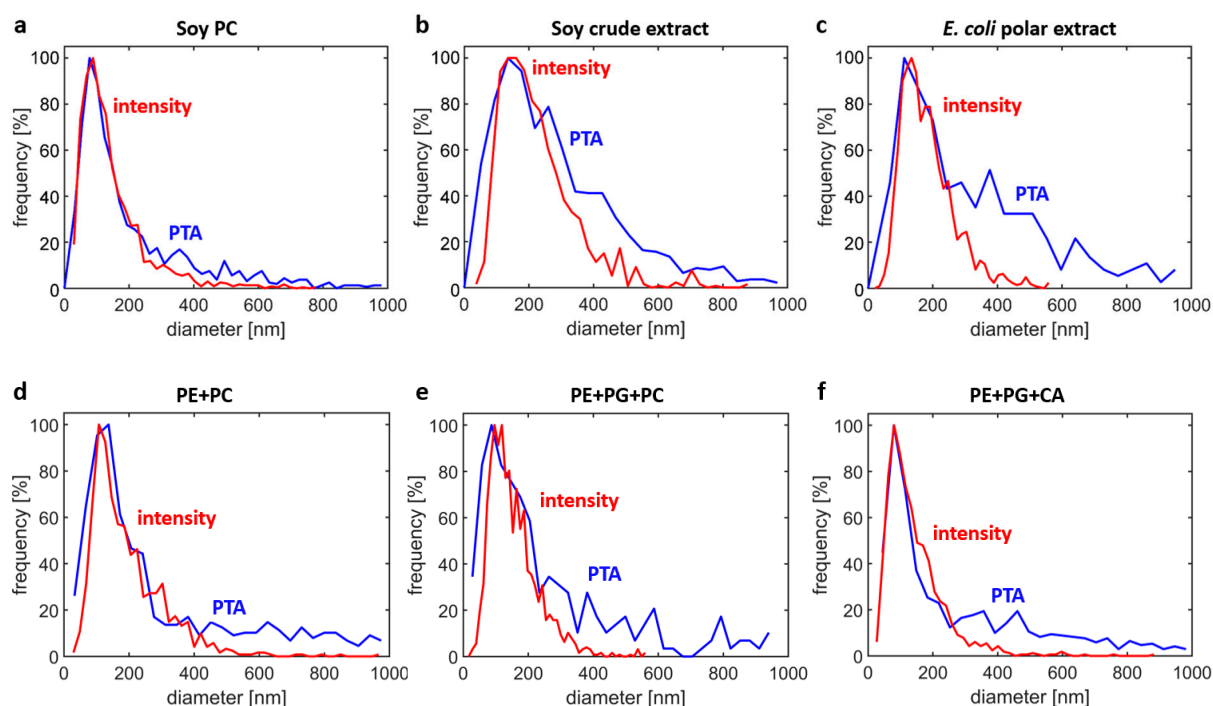

**Figure S1.** Size distributions of CcO-containing proteoliposomes which have been formed using either (a) the PC fraction of soybean-derived lipids, (b) a crude lipid fraction of soybean-derived lipid, (c) the polar extract of *E. coli* or (d-f) the “PE+PC”, “PE+PG+PC”, and “PE+PG+CA” mixture (as detailed in Table 1 of the main manuscript). Shown are the size distributions obtained using particle tracking analysis (PTA) of suspended proteoliposomes (blue traces) as well as using the fluorescence intensity of surface-tethered proteoliposomes (red traces; see Material and Methods section for details on these methods).

## S2. Proton turnover rate distributions for proteoliposomes made from a crude extract of soybean lipids

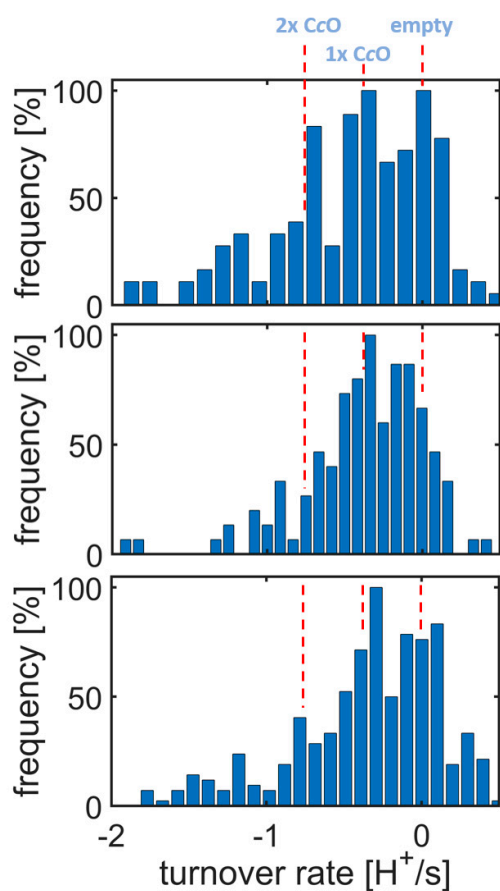

**Figure S2.** Distributions of the total proton turnover rate extracted from repetitions of the single-liposome assay applied to CcO-containing proteoliposomes (made from a crude extract of soybean lipids). These repetitions have been done on 3 independent measurement days using freshly prepared proteoliposomes. The red dashed lines indicate the position of peaks that replicate well in the repetitions.
